# Supplementary material
Source: publisher figshare collection journal article supplement (https://frontiersin.figshare.com/ndownloader/files/13574678)
Supplement: Supplementary file [file 13574678]

**Table S2.** Frequency of choosing the *none* option: The result of Shaffer's multiple comparison for the age factor at each of the personality factors. The symbols summarize the results as \*\*\*:  $p < 0.01$ ; \*:  $p < 0.05$ ; and n.s.:  $p \geq 0.05$ ).

| Pair         | t-value | d.f. | adjusted p-value |      |
|--------------|---------|------|------------------|------|
| Gender       |         |      |                  |      |
| 4th – 6th    | 1.64    | 203  | 0.102            | n.s. |
| 4th – Adults | 4.19    | 203  | $< 10^{-4}$      | ***  |
| 6th – Adults | 2.92    | 203  | 0.0038           | ***  |
| Goodness     |         |      |                  |      |
| 4th – 6th    | 0.13    | 203  | 0.90             | n.s. |
| 4th – Adults | 6.25    | 203  | $< 10^{-4}$      | ***  |
| 6th – Adults | 6.58    | 203  | $< 10^{-4}$      | ***  |
| Age          |         |      |                  |      |
| 4th – 6th    | 0.32    | 203  | 0.75             | n.s. |
| 4th – Adults | 5.03    | 203  | $< 10^{-4}$      | ***  |
| 6th – Adults | 5.09    | 203  | $< 10^{-4}$      | ***  |
| Sociability  |         |      |                  |      |
| 4th – 6th    | 2.16    | 203  | 0.032            | *    |
| 4th – Adults | 4.46    | 203  | $< 10^{-4}$      | ***  |
| 6th – Adults | 2.72    | 203  | 0.0072           | ***  |
